# Supplementary material for: BCCIPβ modulates the ribosomal and extraribosomal function of S7 through a direct interaction
Source: PubMed Central journal article supplement — J Mol Cell Biol. 2017 May 16;9(3):209–19. doi: 10.1093/jmcb/mjx019 (PMC5907838; doi:10.1093/jmcb/mjx019), 2017-05-16
Supplement: supplementarymaterial.pdf [file supplementarymaterial.pdf]

**BCCIP $\beta$  modulates the ribosomal and extraribosomal function of S7 through a direct interaction**

Qian Ba, Xiaoguang Li, Chao Huang, Junyang Li, Yijing Fu, Peizhan Chen, Juan Duan, Miao Hao, Yinghua Zhang, Jingquan Li, Chuanqi Sun, Hao Ying, Haiyun Song, Ruiwen Zhang, Zhiyuan Shen, and Hui Wang

**Table of contents**

Supplementary Methods

Supplementary Results

Supplementary Figure S1

Supplementary Figure S2

Supplementary Figure S3

Supplementary Figure S4

## **Supplementary Methods**

### ***BCCIP $\beta$ -S7 interaction analysis by docking***

The three-dimensional structures of BCCIP $\beta$  and S7 were predicted in a I-TASSER server according to the protein sequences without additional restraints<sup>1</sup>. The quality of models was estimated by the confidence score (C-score). Prior to the docking procedure, the coordinates of S7 and BCCIP $\beta$  models were subjected to energy minimization by CHARMM force field implemented in Discovery studio software. A ZDOCK server was utilized to perform unrestrained, pair wise, rigid body docking for BCCIP $\beta$  and S7, which could predict and evaluate the interactions in the BCCIP $\beta$  and S7 complex. Docking was accomplished without specifying the binding residues so that the results exhibited the most probable interaction patterns without any arbitrary restrains. From thousands of candidates, the ZDOCK server ranked the 50 most probable predictions on the basis of electrostatic complementarity, hydrophobicity, and geometry of the molecular surface. The important residues in the BCCIP $\beta$ -S7 complex were identified on the basis of docking Z-score.

## **Supplementary Results**

### ***The three-dimension structures of BCCIP $\alpha$ and BCCIP $\beta$ are different***

Although BCCIP $\alpha$  and BCCIP $\beta$  share protein sequences with high similarity, their stereo structures are distinct. According to the simulation, the BCCIP $\alpha$  protein has a globular and compact structure.  $\alpha$ -Helices and  $\beta$ -sheets are distributed in a staggered manner, making the structure more stable (Fig S2A). For BCCIP $\beta$ , the overall

structure resembles a rectangle with  $\alpha$ -helices in the same direction, which gives it greater flexibility (Fig S2A). In regard to the N-terminal binding domain, the negative-charged groove in BCCIP $\beta$  is more open and larger than that in BCCIP $\alpha$  for S7 binding (Fig S2A). In addition, the presence of strong positive charges such as K235, K236, and K237 around the negatively charged pocket in BCCIP $\alpha$  (arrow in Fig S2A) may also prevent its association with S7. Therefore, the distinct three-dimension structures determine the differential capacity of BCCIP $\alpha$  and BCCIP $\beta$  to interact with S7.

## Reference

1. Roy A, Kucukural A, Zhang Y. I-TASSER: a unified platform for automated protein structure and function prediction. *Nature protocols* **5**, 725-738 (2010).

## Supplementary Figures

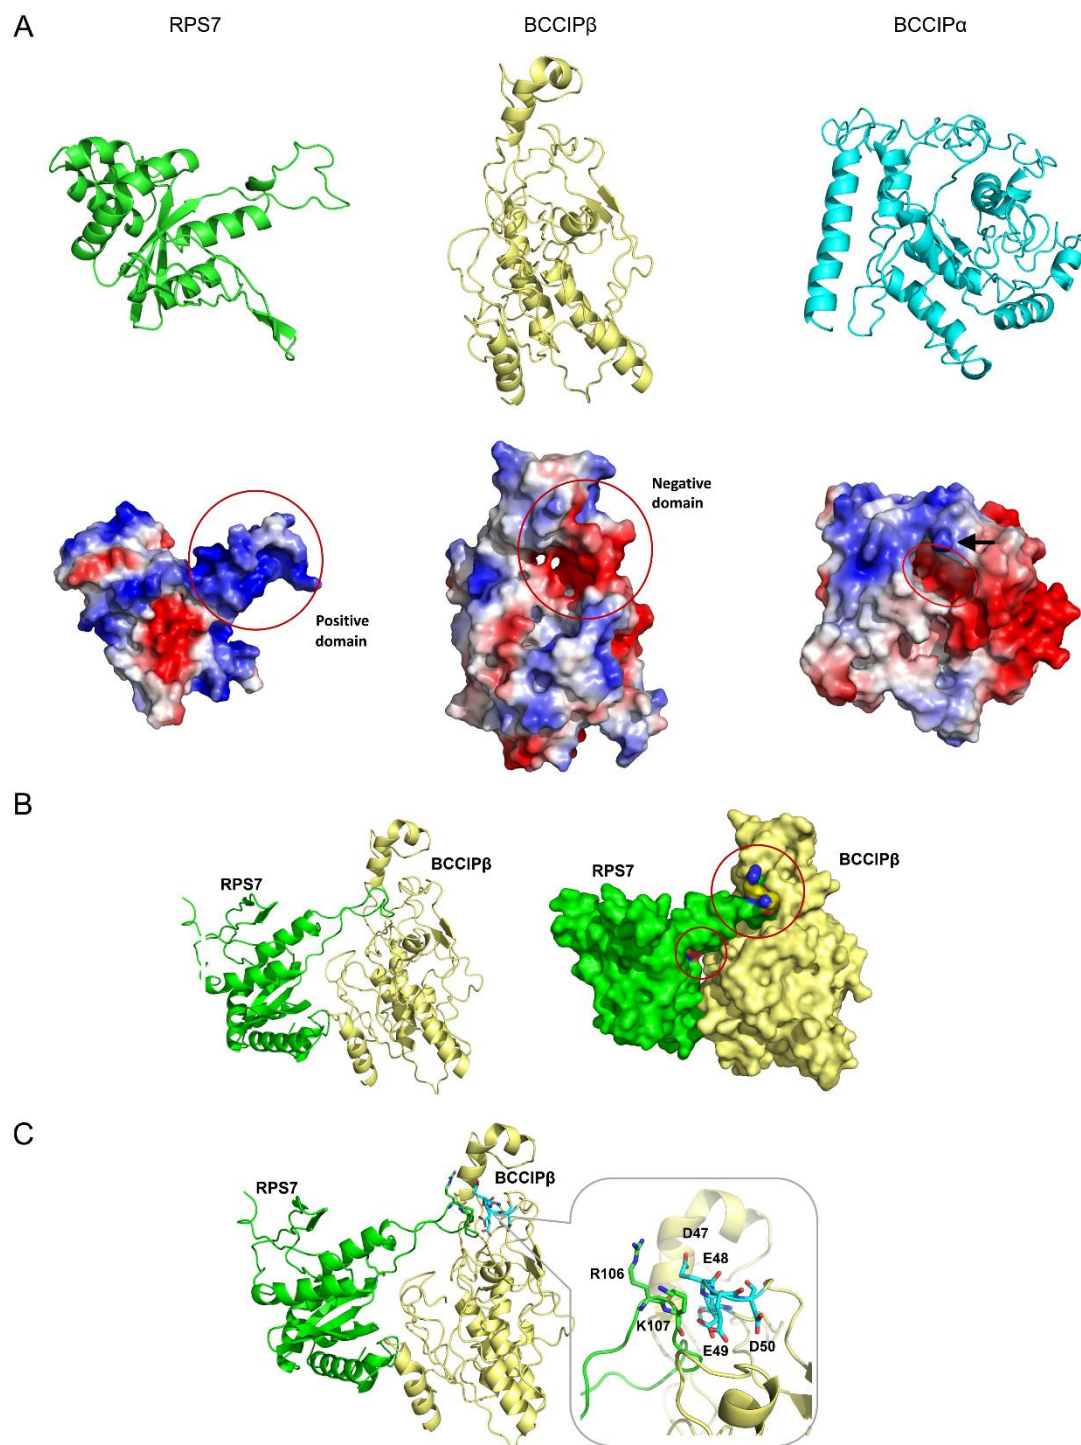

Supplementary Figure S1. (A) The predicted three-dimensional structures (upper panel) and the false red/blue charge-smoothed surfaces (lower panel) of S7, BCCIP $\beta$ , and BCCIP $\alpha$  are shown. Blue, positive charge; red, negative charge. The extension

arm with positive charge in S7 and the groove with negative charge in BCCIP  $\beta$  are indicated by circles. (B) The docking model of S7 and BCCIP $\beta$ . The positive area in S7 interacts with the negative area in BCCIP $\beta$ . (D) The predicted key amino acids for S7-BCCIP $\beta$  binding are shown.

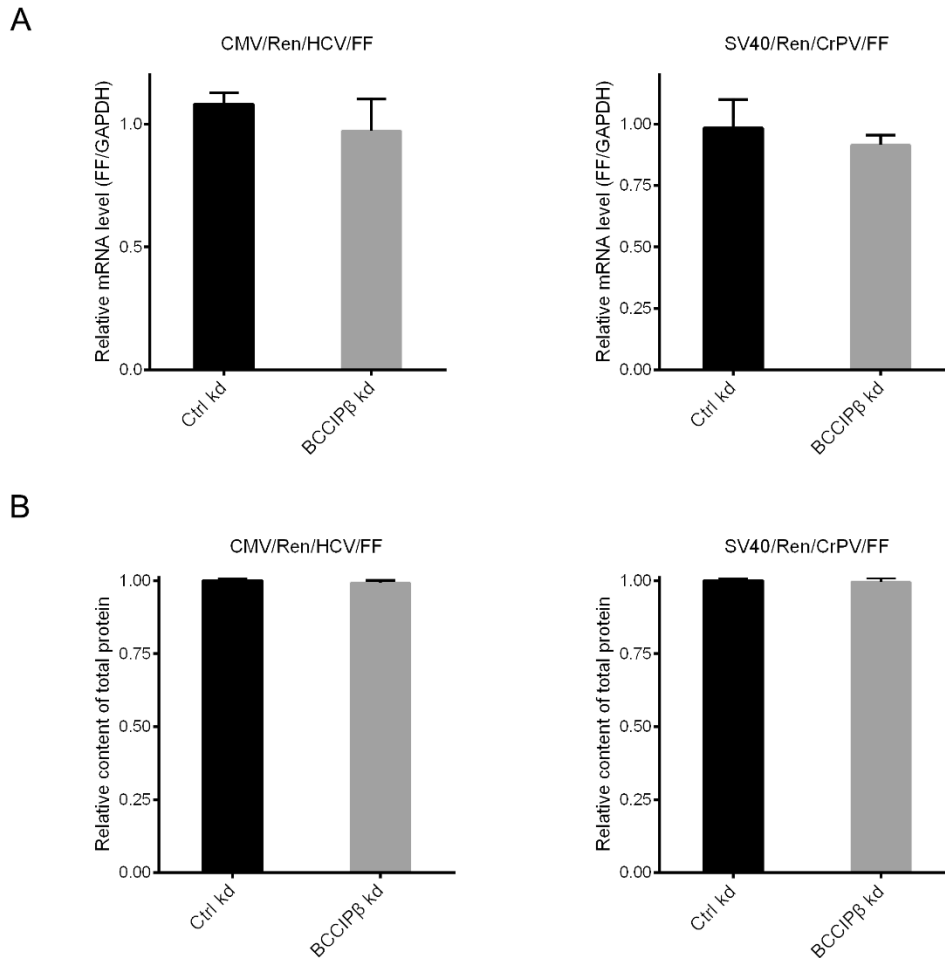

Supplementary Figure S2. (A) Control and BCCIP $\beta$  kd U2OS cells were transfected with the indicated bicistronic reporter plasmid, and mRNA levels of firefly luciferase (FF) were determined by realtime PCR. The primers were as follows: FF forward, 5'-CAT ACT CCA GGG TTA CGG-3', reverse, 5'-GGT ACT ATC GCA GCA TCT T-3'; and GAPDH forward, 5'-GGA GTC CAC TGG CGT CTT CAC-3', reverse, 5'-GAG GCA TTG CTG ATG ATC TTG AGG-3'. (B) Control and BCCIP $\beta$  kd U2OS cells were transfected with the indicated bicistronic reporter plasmid, and the total protein was harvested and measured.

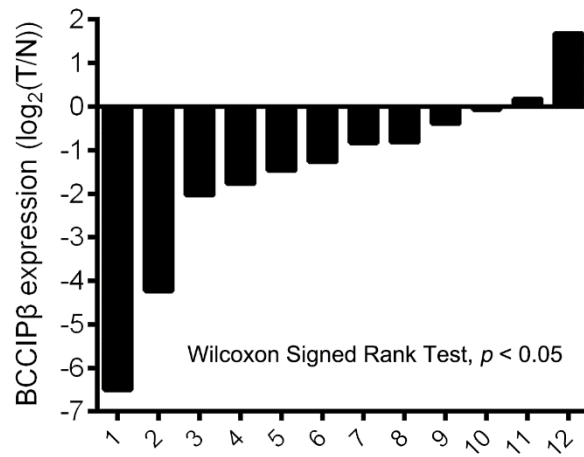

Supplementary Figure S3. BCCIP $\beta$  expression in 12 paired human liver cancer (T) and adjacent normal (N) tissues was determined by Western blotting. The protein level of BCCIP $\beta$  was quantitated by Image J and normalized to that of GAPDH.

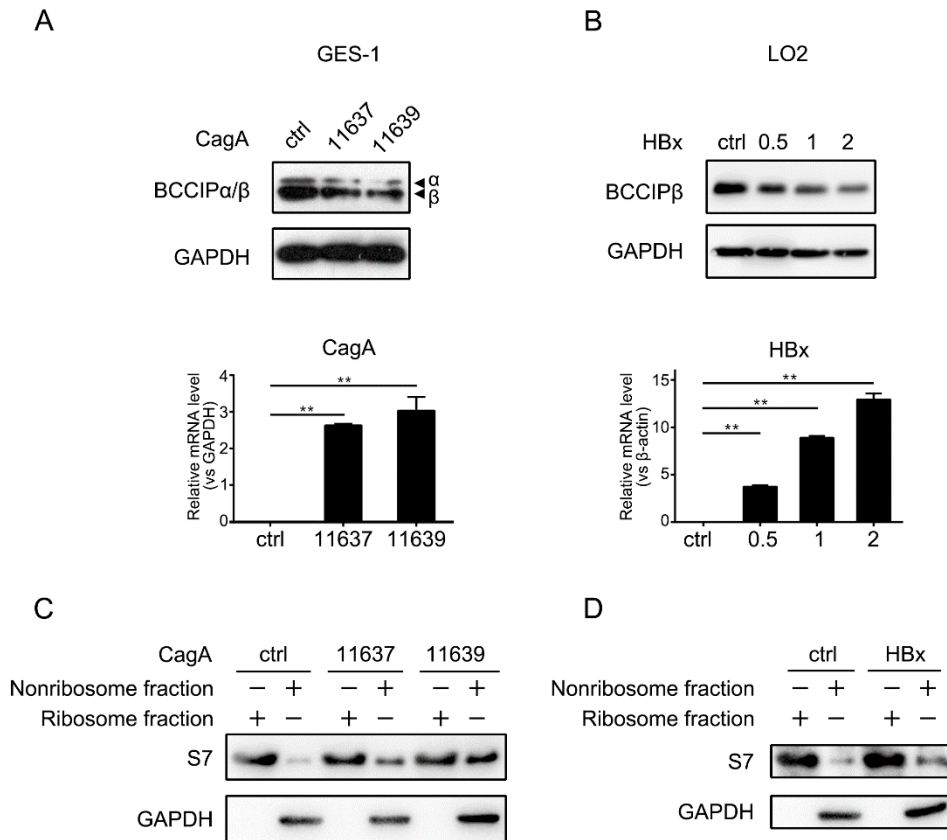

Supplementary Figure S4. CagA was ectopically expressed in the human gastric epithelial cell line, GES-1 (A), and HBx was ectopically expressed in human liver cells, LO-2 (B). Target proteins were detected by Western blotting (upper panel), and mRNA was determined by realtime PCR (lower panel). The primers were as follows: CagA 11637 forward, 5'-AAC AAC CAC AAA CCG AAG CG-3', reverse, 5'-ATC GTA TGA AGC GAC AGC GT-3'; CagA 11639 forward, 5'-CAG CAA GGT AAC GCA AGC AA-3', reverse, 5'- GCT TGC TCT ACC CCA CTG AA-3';  $\beta$ -actin forward, 5'-GGC GGC ACC ACC ATG TAC CCT-3', reverse, 5'- AGG GGC CGG ACT CGT CAT ACT-3'; and GAPDH forward, 5'-GGA GTC CAC TGG CGT CTT CAC-3', reverse, 5'-GAG GCA TTG CTG ATG ATC TTG AGG-3'. (C and D) After transfection with CagA (C) or HBx (D) for 48 h, the proteins in nonribosomal and ribosomal fractions were separated and subjected to Western blotting.
